# Supplementary material
Source: publisher figshare collection journal article supplement (https://tandf.figshare.com/articles/dataset/_/1568461)
Supplement: Supplementary file 1 [file 2]

## ONLINE SUPPLEMENTARY MATERIAL

Journal of Vertebrate Paleontology

Taxonomic revision of *Plesiofuro mingshuica* from the Lower Triassic of northern Gansu, China, and the relationships of early neopterygian clades

GUANG-HUI XU,<sup>1</sup> KE-QIN GAO,<sup>2</sup> and MICHAEL I. COATES<sup>3</sup>

<sup>1</sup>Key Laboratory of Vertebrate Evolution and Human Origins of Chinese Academy of Sciences, Institute of Vertebrate Paleontology and Paleoanthropology, Chinese Academy of Sciences, Beijing 100044, China, xuguanghui@ivpp.ac.cn;

<sup>2</sup>School of Earth and Space Sciences, Peking University, Beijing 100871, China, kqgao@pku.edu.cn;

<sup>3</sup>Department of Organismal Biology and Anatomy, University of Chicago, Chicago, Illinois 60637, U.S.A., mcoates@uchicago.edu

**(a) Characters and character states used in the phylogenetic analysis.**

The characters are mainly adopted or modified from previous publications on the phylogenetic relationships of the Neopterygii (GS, Gardiner and Schaeffer, 1989; B rigin, 1992; GML, Gardiner, Maisey and Littlewood, 1996; GSM, Gardiner, Schaeffer and Masserie, 2005); P, Pinna, 1996; GB, Grande and Bemis, 1998; G, Grande, 2010; C, Coates, 1999; CA, Cloutier and Arraita, 2004; LZ, L pez-Arbarello and Zavattieri, 2008; XG, Xu and Gao, 2011; XW, Xu and Wu, 2012; X, Xu et al., 2012; XGF, Xu, Gao and Finarelli, 2014; Lane and Ebert, 2012; Arratia, 2013).

- (1) Post-temporal fossa: absent (0); present (1). (GS28)
- (2) Sub-temporal fossa: absent (0); present (1). (GS29)
- (3) Dilator fossa: absent (0); present (1). (GS31)
- (4) Parasphenoid: short, terminates at otic fissure (0); medium, extends across otic fissure but not contact basioccipital (1); long, extends to basioccipital (2). (Modified from GSM8)
- (5) Basipterygoid process: present (0); absent (1). (GSM12)
- (6) Frontal: elongated (0); laterally expanded (1). (X33)
- (7) Supraorbital sensory canal ending at anterior half of frontal: absent (0); present (1). (X34)
- (8) Number of extrascapulars: more than one pair (0); one pair (1). (Modified from X16)
- (9) Posttemporal: contacting extrascapular posteriorly (0); contacting extrascapular posteromedially and separating this bone from contact with its counterpart (1); lost (2). (Modified from X27)
- (10) Intertemporal: present (0); absent (1). (Modified from GSM17)
- (11) Dermosphenotic/nasal contact: present (0); absent (1). (Modified from GS19)
- (12) Shape of dermosphenotic: elongate (0); keystone-shaped (1).
- (13) Dermosphenotic attachment to skull roof in adult-sized individuals: loosely attached on the skull roof or hinged to the side of skull roof (0); firmly sutured into skull roof, forming part of it (1). (GB56)
- (14) Distinct premaxilla: absent (0); present as a pair of elements (1) fused as a median element (2). (Modified from X30)
- (15) Distinct nasal process of premaxilla: absent (0); present (1). (GS24)
- (16) Number of infraorbitals between antorbital and dermosphenotic: two or three (0); four or more (1). (Modified from GS21)
- (17) Supraorbital: absent (0); single (1) two or more (2). (GS14)
- (18) Suborbital: present (0); absent (1). (Modified from GS9)
- (19) Dermohyal: present (0); absent (1). (Modified from GSM24)
- (20) Maxilla free from preopercle: absent (0); present (1). (C15)
- (21) Supramaxilla: absent (0); present (1). (Modified from GS22)
- (22) Mobile maxilla in cheek: absent (0); present (1). (C16)
- (23) Coronoid process: absent (0); present (1). (GS17)
- (24) Suspensorium angle: acute, 30–50 , hyoid facet directed posteroventrally (0);

- moderately acute, 60–80° (1); nearly vertical, 80–90°, hyoid facet horizontal (2). (Modified from GSM29)
- (25) Hyomandibular with canal for hyoid branch of nerve VII: absent (0); present (1). (Modified from C22)
- (26) Quadratojugal: plate-like, overlying quadrate (0); much reduced or lost (1). (Modified from GSM26; C20)
- (27) Symplectic: absent (0); present, contacting quadrate (1); present, separated from quadrate by quadratojugal (2). (Modified GSM13)
- (28) Symplectic/articular contact: absent (0); present (1). (GB61; G49; XW37)
- (29) Elongated posteroventral process of quadrate: absent (0); present (1). (Modified from GML24)
- (30) Uncinate processes on epibranchials: absent (0); present (1). (C25)
- (31) Interopercle: absent (0); present (1). (GS18)
- (32) Pectoral fins enlarged as wings: absent (0); present (1). (X66)
- (33) Pelvic fins enlarged as auxiliary wings: absent (0); present (1). (X70)
- (34) Median fins (except caudal fin): rays more numerous than radials (0); rays and radials nearly equal in number (1). (GSM31)
- (35) Dorsal and anal fin rays: segmented throughout the length (0); segmented distally (1). (Modified from XG62)
- (36) Caudal fin rays: terminate at caudal extremity of body axis (0); extend beyond termination of body axis (1). (Modified from GSM32)
- (37) Dense lepidotrichial segments of pectoral fin rays between innermost principle pectoral fin ray and body: absent (0); present (1). (X71)
- (38) Peg-and-socket articulation on flank scales: present (0); absent (1). (GS3)
- (39) Clavicle: present as a broad plate (0); much reduced or lost (1). (Modified from GML37)
- (40) Number of lachrymal bone(s): single (0); two or more (1). (G21; XW24)
- (41) Sphenotic with small dermal component: absent (0); present (1). (G23; XW16)
- (42) Postrostral bone(s): absent (0); present (1). (Modified from GML19; XW17)
- (43) Tube-like canal bearing anterior arm of antorbital: absent (0); present (1). (G12; XW19)
- (44) Antorbital: small and low (0); enlarged and deep (1); lost (2). (Modified from X26)
- (45) Premaxilla immovably attached to braincase by means of a long nasal process tightly sutured to frontals: absent (0); present (1). (G6; XW30)
- (46) Foramen for olfactory nerve on premaxilla: absent (0); present (1). (Modified from G8; XW20)
- (47) Pterotic: present (0); absent (1). (GML2)
- (48) Opisthotic: present (0); absent (1). (G33)
- (49) Supraoccipital: absent (0); present (1). (G28)
- (50) A gap between hypurals 2 and 3: absent (0); present (1). (Arratia, 2013)
- (51) Rostral(s): cap-like, partially or wholly separating nasals (0); much reduced or lost by fusion with other elements (1). (XW17; modified from GML19)
- (52) Postrostral: absent (0); present (1).

- (53) Internal carotid foramen on parasphenoid: absent (0); present (1). (GML14)
- (54) Efferent pseudobranchial foramen on parasphenoid: absent (0); present (1). (GML15)
- (55) Intercalar: present (0); absent (1). (GML4)
- (56) Suborbital/maxilla contact: present (0); absent (1). (Modified from CA88)
- (57) Posterior margin of maxilla: straight or slightly convex (0); concave with a posterior maxillary notch (1). (GB62; XW46)
- (58) Quadratomandibular articulation: behind or below posterior border of orbit (0); anterior to posterior border of orbit (1). (Modified from LZ2; X56)
- (59) Accessory dermopterotic: absent (0); present (1). (Hutchinson, 1973b)
- (60) Number of hypobranchials: three (0); four (1). (G99; XW42)
- (61) Median gular: present (0); absent (1). (Modified from C11)
- (62) Size of median gular relative to lateral gular: median gular smaller than lateral gular (0); median gular larger than lateral gular (1). (Modified from XGF98)
- (63) Antorbital process on maxilla: absent (0); present (1).
- (64) Uronerual: absent (0); present (1). (XW56)
- (65) Opercle: larger than subopercle (0); roughly equal to or smaller than subopercle (1). (XW43)
- (66) Maxillary process on preopercle: present (0); absent (1).
- (67) Teeth on maxilla: present (0); absent (1). (Modified from LZ11)
- (68) Solid vertebral centra of adult-sized individuals: absent (0); present (1). (Modified from GB4)
- (69) Rudimentary fin rays near dorsal margin of caudal fin in adults: absent (0); present (1). (Modified from LZ19)
- (70) Scales in anterior flank region: present (0); absent (1). (Modified XGF67)
- (71) Shape of scales: rhomboid (0); amioid-type, subrectangular to elongate oval (1); circular. (X80)
- (72) Posteriorly inclined scales in pectoral region: absent (0); present (1). (LZ24)
- (73) Dorsal ridge of spine-like scales: absent (0); present (1). (LZ22)
- (74) Caudal fin: forked, lower lobe slightly shorter than or equal to upper lobe (0); forked, lower lobe longer than upper lobe (1); unforked (2). (Modified from X76)
- (75) Fringing fulcra: present (0); absent (1). (XGF50)

**(b) Data matrix of taxa and characters.**

*Pteronisculus stensiöi*

000000000000?00000000010000000000000000000000?000000?00000000000000  
000000

*Acipenser brevirostrum*

1001100001100000111--000000000000000010001020-0000-1001--0000000---00000  
001

*Australosomus kochi*

1110100101---??00000000100000100000100000000000?000?00?100000000000010

00001

*Platysiagum minus*

????00101000??01000002????0000010000000000??0?00???1000?010?1000000  
0000

*Polzbergia brochatus*

????001211101?02?000012????0000010000000?00?0?0????1010???0?10001000  
000

*Cleithrolepidina minor*

????00121110?0020000002?0???00000100?0000000?0?00???1001?0?0?1010100  
1000

*Cleithrolepis granulate*

????0002111010020000002?0???00000100?0000000?0?00???1001?0?0?1010100  
1000

*Perleidus madagascariensis*

11110001011101002000000211??0100011100?00000000?0?0000?100000100100010  
00000

*Plesiofuro mingshuica*

????0010111010020000002?1???00011100?0000000?0?00???1000?010?1000100  
0000

*Pseudobeaconia elegans*

????0000111010021000002????00011100?0010000?0?01???1000?010?1000100  
0100

*Peltoperleidus macrodontus*

????00?0111010020000002?1???00011100?0000000?0?00???1000???0?1000100  
0000

*Peltopleurus rugosus*

????0000111010020000002?1???00011100?0000000?0?00???1000?010?0000100  
0001

*Peripeltopleurus hypsisomus*

???2?111111010020000002?1???00011100?0000100?0?00???1000?0?0?0000100  
0011

*Thoracopterus niederristi*

????1111111010010000002????01111110?0000100?0000???1000?0?0?00001000  
011

*Potanichthys xingyiensis*

???2?1111111020020000002???0?01111111?0000100?000000?100000?000000110  
0011

*Gigntopterus telleri*

????11111110?0020000002????01111111?0000100?0000???1000???0?0000?100  
011

*Luganoia lepidosteoides*

???2?00001110200200001121????00011100?0000200?0?10???1010?011?1000100  
0021

*Habroichthys minius*

????00101110?0001110112????0?00011100?000010??0?10???1010?0?0?01101000  
001

*Furo muensteri*

???2?001011111120111112?1110?100111001010111???0010???1100?01000101000  
0000

*Amia calva*

1012000101111111011111121111011001110110101111110010000110010100010100  
10021

*Lepisosteus osseus*

0012000101110111201110121120010001110011101111110010001101011200010100  
00020

*Semionotus elegans*

???2?001011101112011111211200110011100111011111100100011010112000100000  
0100

*Leptolepis coryphaenoides*

1112000101110111201111121110111001110000000100001110110100000101010100  
20000

*Hiodon tergisus*

1?12100101110111011110121110111001110110000100011110000100001201010100  
20001

### (c) Literature Cited

- Arratia, G. 2013. Morphology, taxonomy, and phylogeny of Triassic pholidophorid fishes (Actinopterygii, Teleostei). Society of Vertebrate Paleontology Memoir (Supplement to Journal of Vertebrate Paleontology) 13:1–138.
- Bürgin, T. 1992. Basal ray-finned fishes (Osteichthyes; Actinopterygii) from the Middle Triassic of Monte San Giorgio (Canton Tessin, Switzerland). Schweizerische Palaontologische Abhandlungen 114:1–164.
- Cloutier, R., and G. Arratia. 2004. Early diversification of actinopterygians; pp. 217–270 in G. Arratia, M. V. H. Wilson, and R. Cloutier (eds.), Recent Advances in the Origin and Early Radiation of Vertebrates. Verlag Dr. Friedrich Pfeil, München.
- Coates, M. I. 1999. Endocranial preservation of a Carboniferous actinopterygian from Lancashire, UK, and the interrelationships of primitive actinopterygians. Philosophical Transactions of the Royal Society of London, Series B 354:435–462.
- Gardiner, B. G., and B. Schaeffer. 1989. Interrelationships of lower actinopterygian fishes. Zoological Journal of the Linnean Society 97:135–187.
- Gardiner, B. G., B. Schaeffer, and J. A. Masserie. 2005. A review of the lower actinopterygian phylogeny. Zoological Journal of the Linnean Society 144:511–525.
- Gardiner, B. G., J. G. Maisey, and D. T. J. Littlewood. 1996. Interrelationships of basal neopterygians; pp. 117–146 in M. L. J. Stiassney, L. R. Parenti, and G. D. Johnson (eds.), Interrelationships of Fishes. Academic Press, San Diego,

California.

- Grande, L. 2010. An empirical synthetic pattern study of gars (Lepisosteiformes) and closely related species, based mostly on skeletal anatomy. The resurrection of Holostei. *Copeia* 10 (Supplement):1–871.
- Grande, L., and W. E. Bemis. 1998. A comprehensive phylogenetic study of amiid fishes (Amiidae) based on comparative skeletal anatomy: An empirical search for interconnected patterns of natural history. *Society of Vertebrate Paleontology Memoir* (supplement to *Journal of Vertebrate Paleontology*) 4:1–690.
- Lane, J.A. and M. Ebert. 2012. Revision of *Furo muensteri* (Halecomorphi, Ophiopsidae) from the Upper Jurassic of Western Europe, with comments on the genus. *Journal of Vertebrate Paleontology* 32:799–819.
- López-Arbarello, A., and A. M. Zavattieri. 2008. Systematic revision of *Pseudobeaconia* Bordas, 1944, and *Mendocinichthys* Whitley, 1953 (Actinopterygii: ‘Perleidiformes’) from the Triassic of Argentina. *Palaeontology* 51:1025–1052.
- Pinna, M. C. C. 1996. Teleostean monophyly; pp. 147–162 in M. L. J. Stiassney, L. R. Parenti, and G. D. Johnson (eds.), *Interrelationships of Fishes*. Academic Press, San Diego, California.
- Xu, G.-H., and F.-X. Wu. 2012. A deep-bodied ginglymodian fish from the Middle Triassic of eastern Yunnan Province, China, and the phylogeny of lower neopterygians. *Chinese Science Bulletin* 57:111–118.
- Xu, G.-H., and K.-Q. Gao. 2011. A new scanilepiform from the Lower Triassic of northern Gansu Province, China, and phylogenetic relationships of non-teleostean Actinopterygii. *Zoological Journal of the Linnean Society* 161:595–612.
- Xu, G.-H., K.-Q. Gao, and J. A. Finarelli. 2014. A revision of the Middle Triassic scanilepiform fish *Fukangichthys longidorsalis* from Xinjiang, China, with comments on the phylogeny of the Actinopteri. *Journal of Vertebrate Paleontology* 34: 747–759.
- Xu, G.-H., L.-J. Zhao, K.-Q. Gao, and F.-X. Wu. 2012. A new stem-neopterygian fish from the Middle Triassic of China shows the earliest over-water gliding strategy of the vertebrates. *Proceedings of the Royal Society B* 280:20122261.
